# Supplementary material for: Genome-wide association study of medication-use and associated disease in the UK Biobank
Source: PubMed Central journal article supplement (PMC6478889; doi:10.1038/s41467-019-09572-5), 2019-04-23
Supplement: 41467_2019_9572_MOESM1_ESM.pdf [file 41467_2019_9572_MOESM1_ESM.pdf]

**Supplementary Information** for

Genome-wide association study of medication-use and associated  
disease in the UK Biobank

*Wu et al.*

## Supplementary Figures

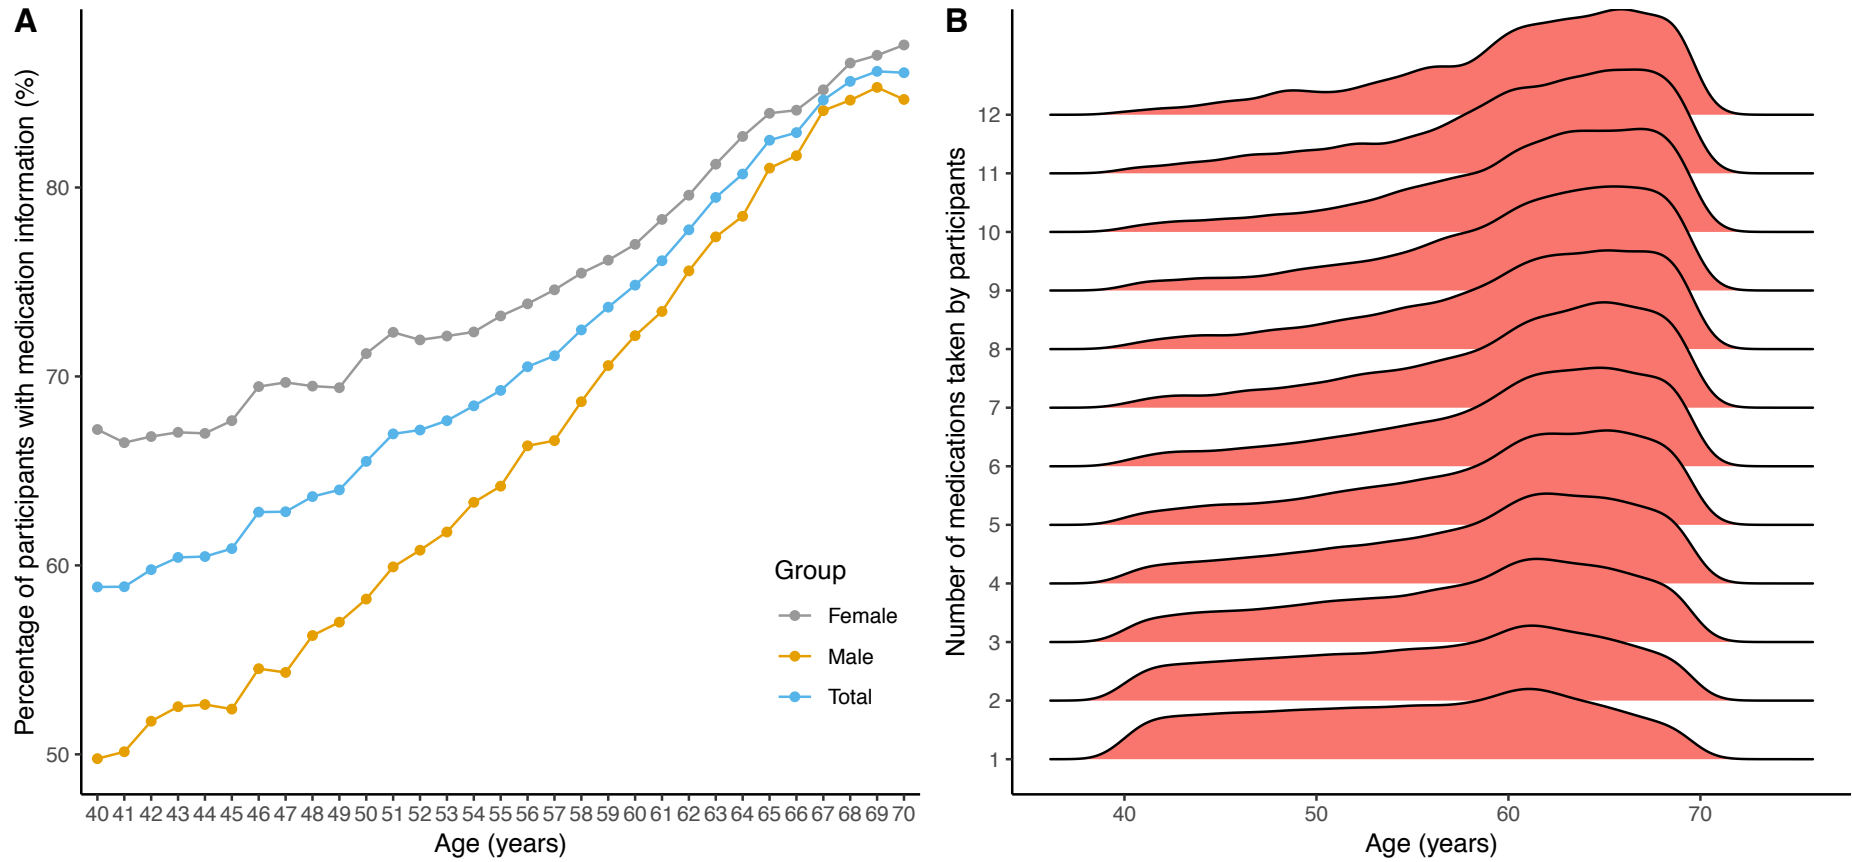

**Supplementary Figure 1. Demographic statistics for participants who completed self-report medication questionnaires at first visit in Biobank. A.** Percentage of participants with medication information at different ages. **B.** Age distribution of participants stratified by the number of medications taken.

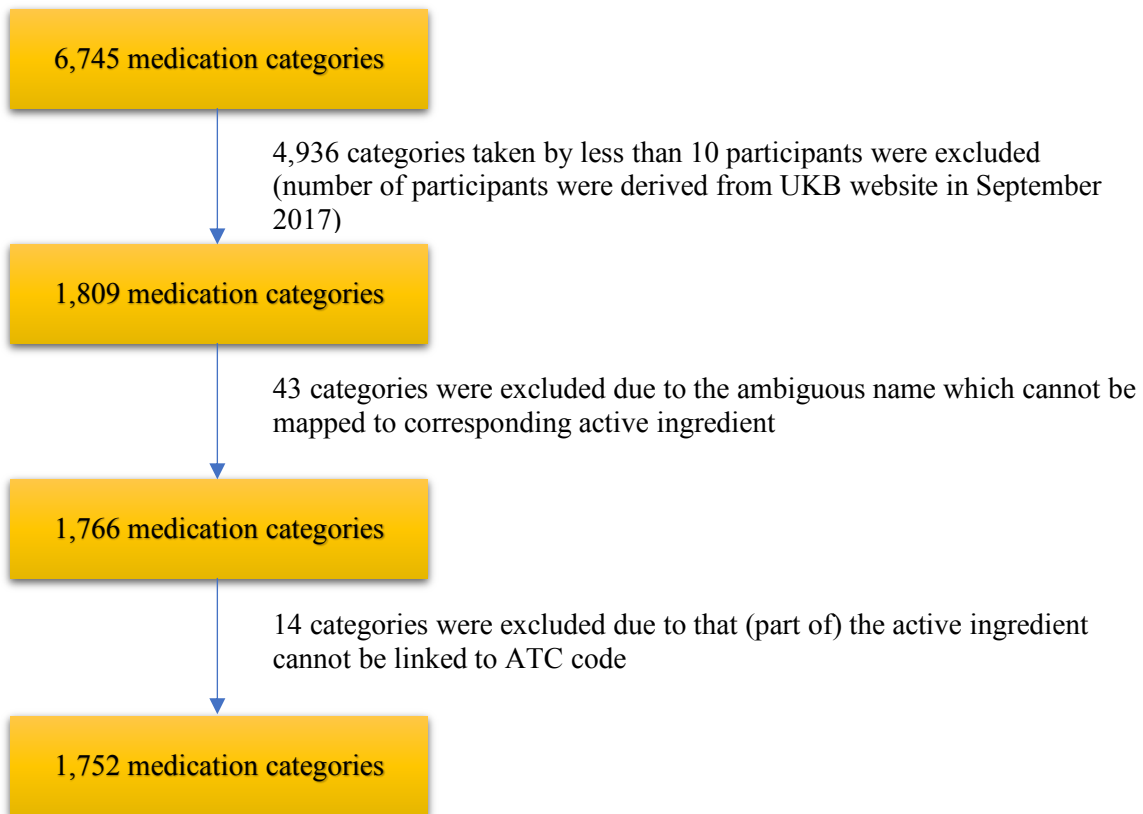

**Supplementary Figure 2. Analysis pipeline of UKB medication.**

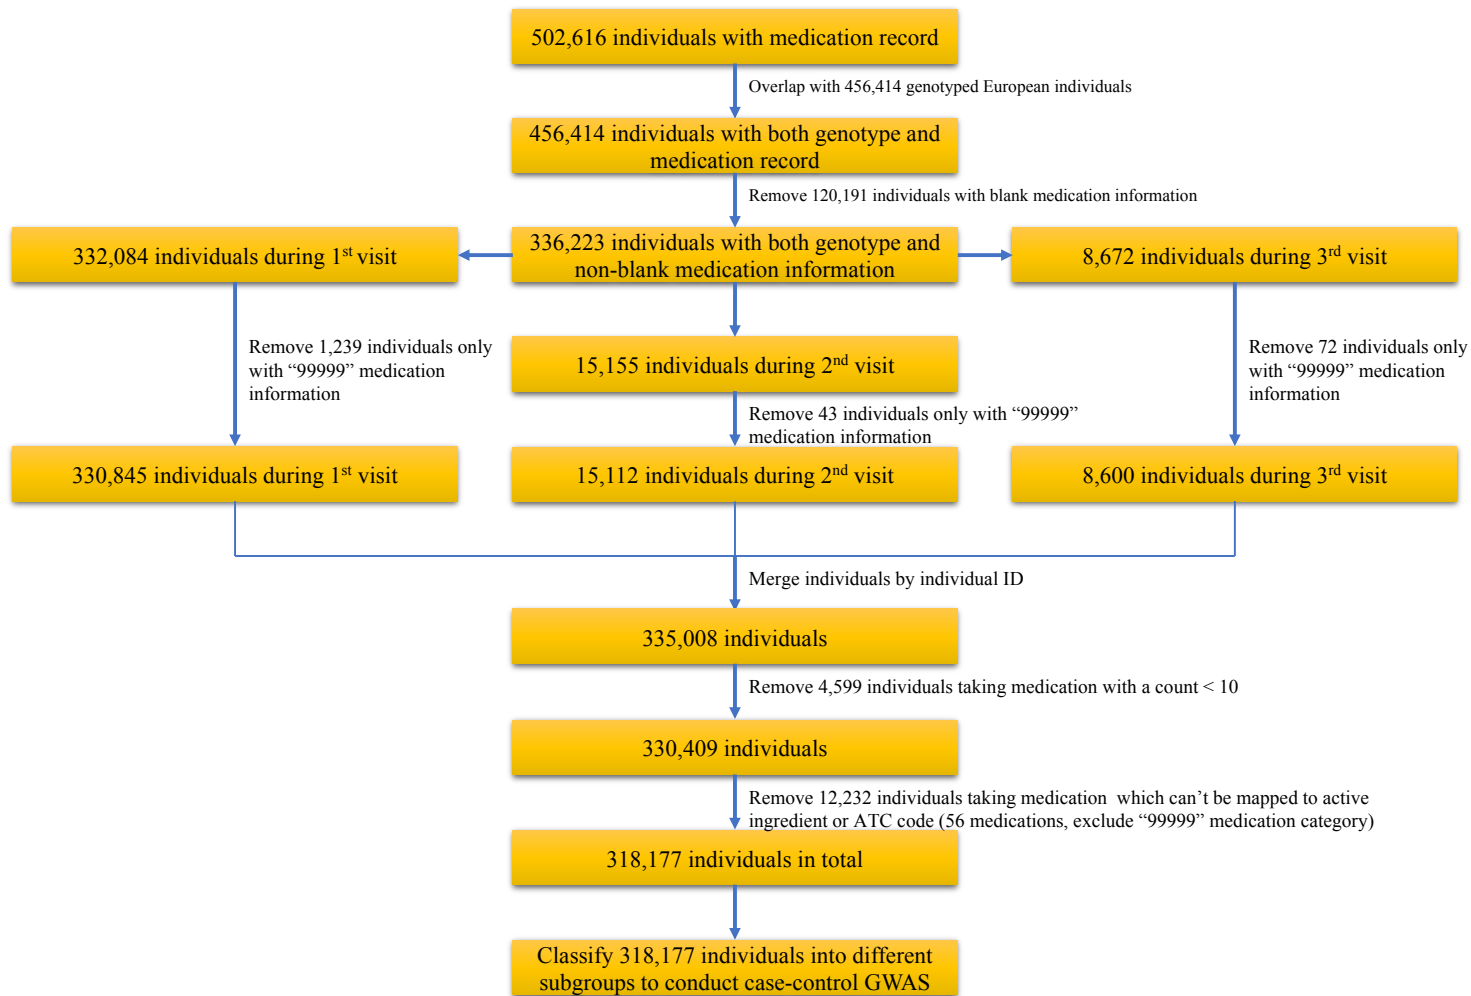

**Supplementary Figure 3. Phenotype extraction pipeline for UKB participants.**

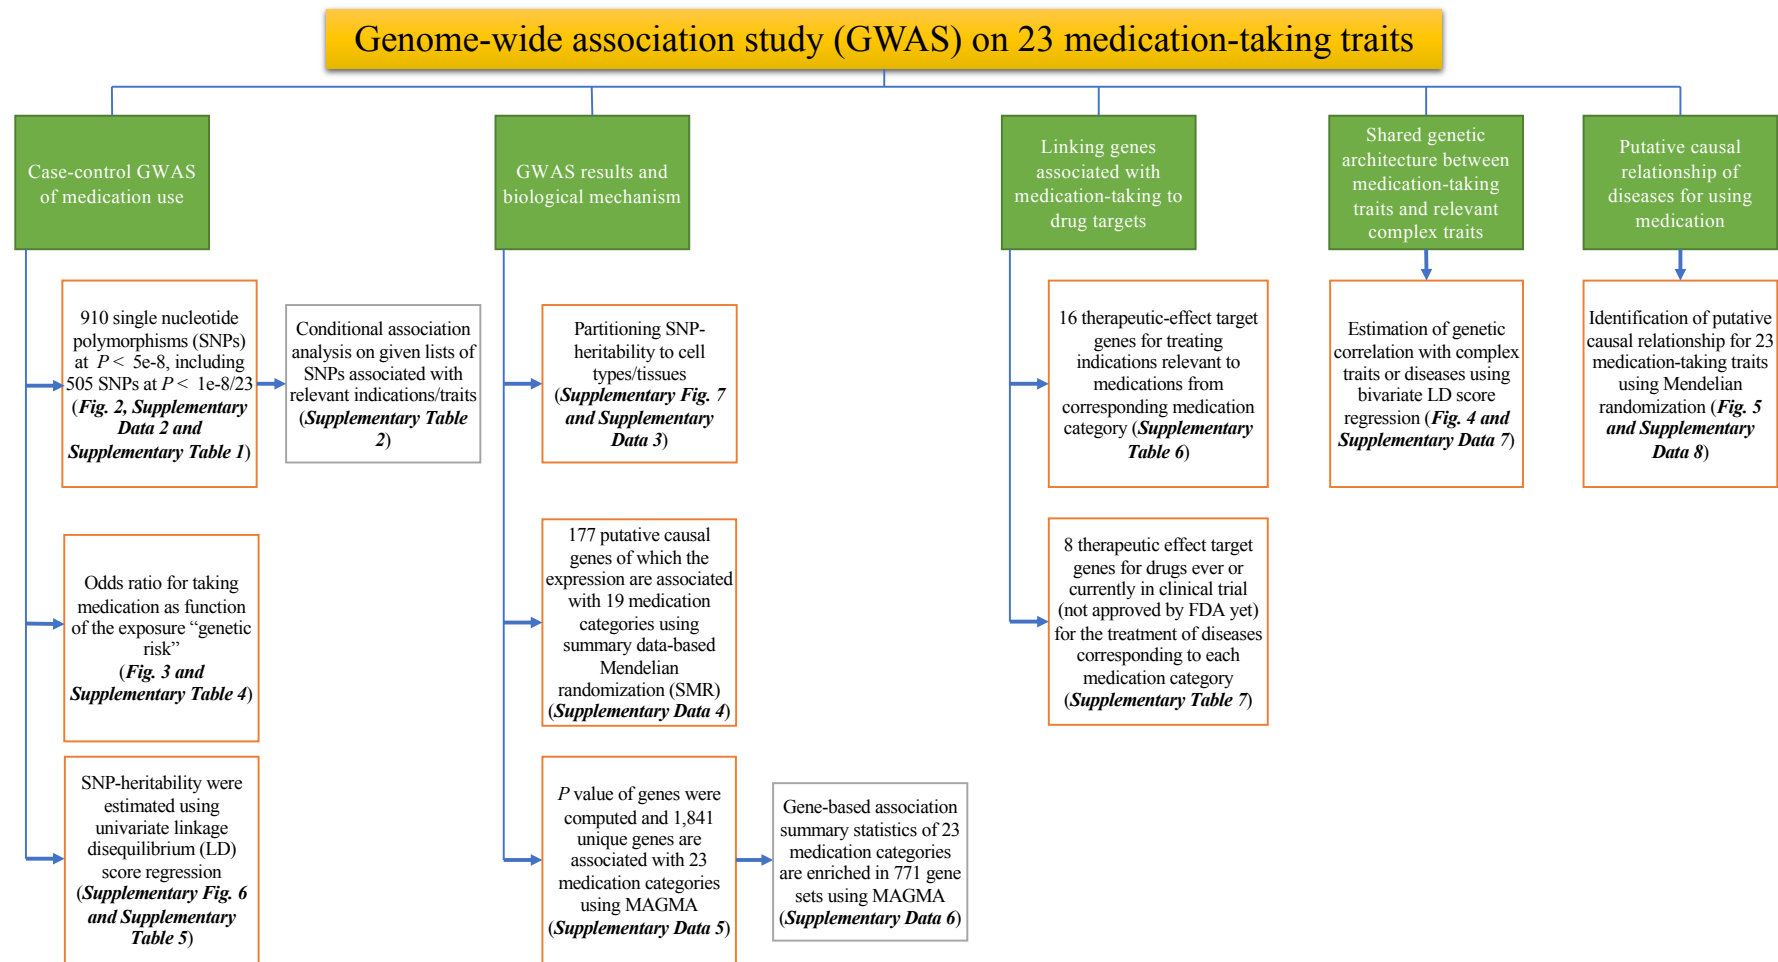

**Supplementary Figure 4. Full analysis workflow of the study.**

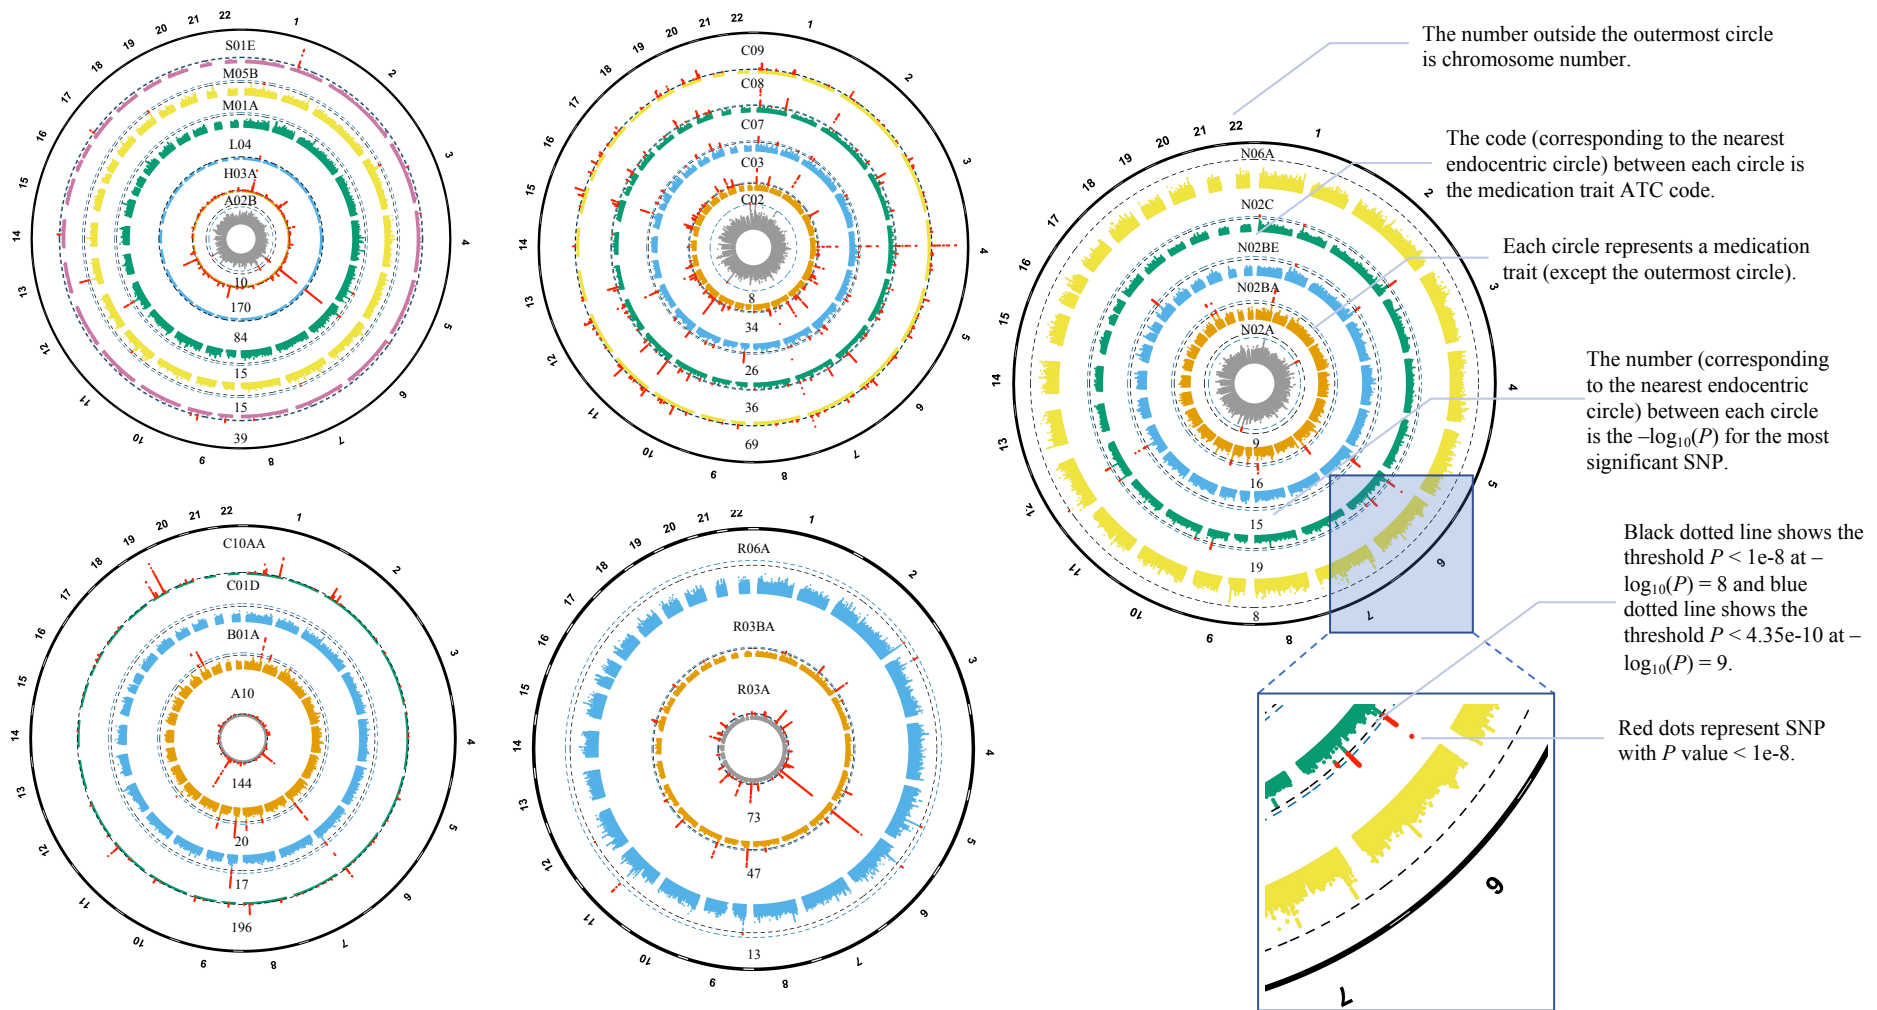

Supplementary Figure 5. Manhattan plot for 23 medication-taking traits.

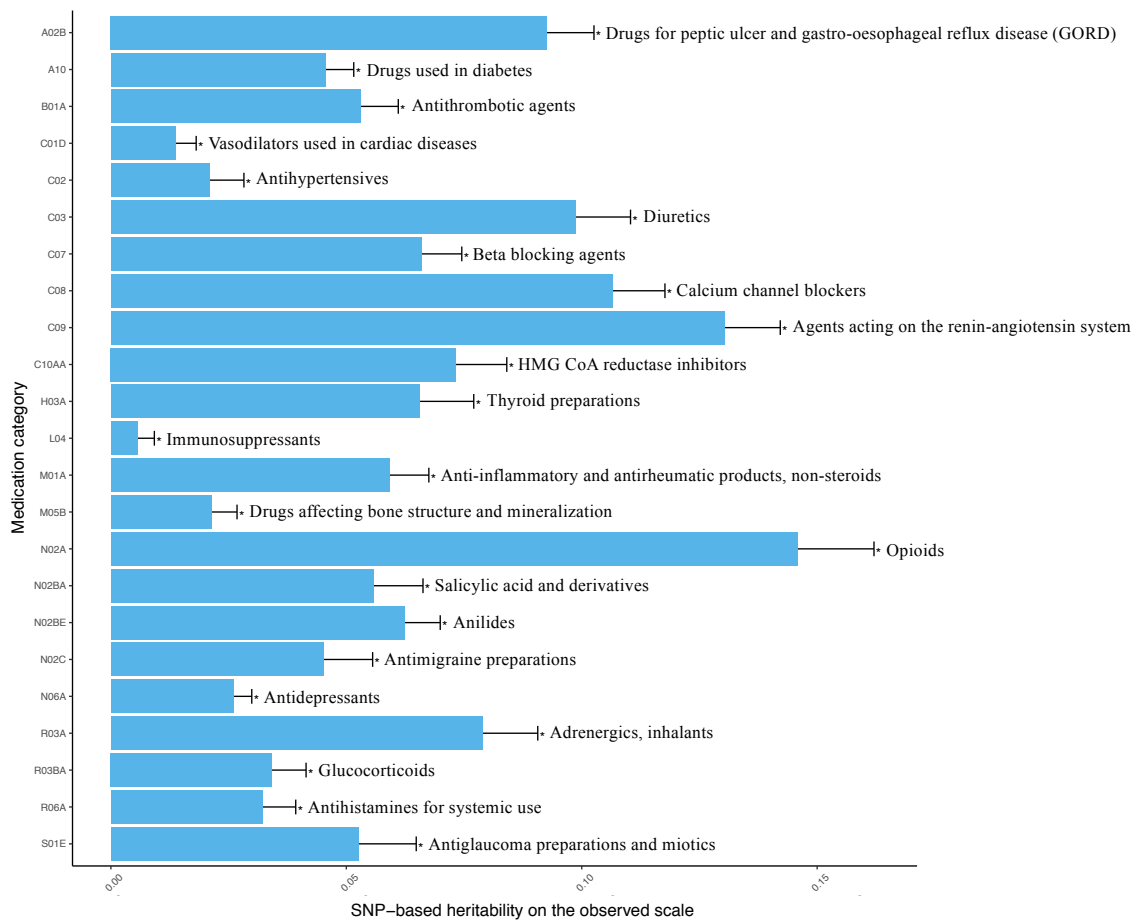

**Supplementary Figure 6. The SNP-based heritability of medication-taking trait.** Texts on the right side represent each medication-taking trait. Error bar represent the upper 95% confidence interval for the observed SNP-based heritability of each medication-taking trait. The significant level were labelled as an asterisk after 23 tests ( $P < 0.05/23$ ). The SNP-based heritability were estimated from linkage disequilibrium (LD) score regression<sup>1</sup>.

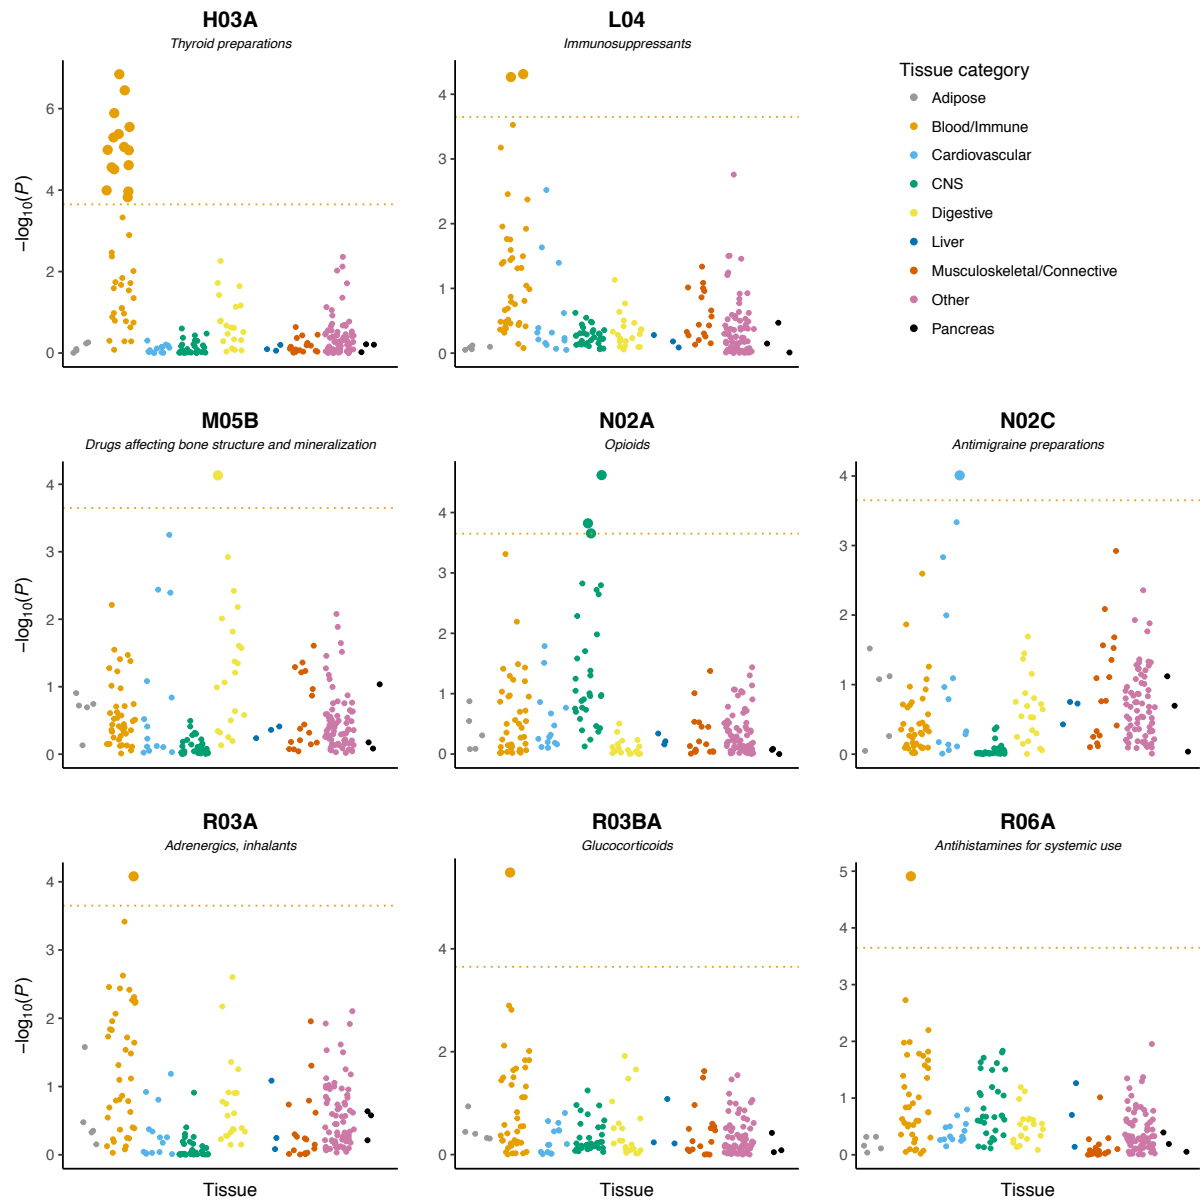

**Supplementary Figure 7. Results of the multiple-tissue analysis for 8 medication-taking traits.** Each dot represents a tissue or cell type. The dotted line shows the threshold of  $FDR < 5\%$  corresponding to  $-\log_{10}(P) = 3.65$ . Large dots pass the threshold.



## Supplementary Tables

**Supplementary Table 1. Summary of medication GWAS.**

| #  | Medication category | Name                                                                | No. of case | No. of control | No. of total | No. independent GWAS hit ( $P \leq 5E-8$ ) | No. independent GWAS hit ( $P < 1E-8/23$ ) |
|----|---------------------|---------------------------------------------------------------------|-------------|----------------|--------------|--------------------------------------------|--------------------------------------------|
| 1  | A02B                | Drugs for peptic ulcer and gastro-oesophageal reflux disease (GORD) | 53137       | 79230          | 132367       | 5                                          | 2                                          |
| 2  | A10                 | Drugs used in diabetes                                              | 15272       | 290641         | 305913       | 57                                         | 33                                         |
| 3  | B01A                | Antithrombotic agents                                               | 67653       | 85986          | 153639       | 13                                         | 11                                         |
| 4  | C01D                | Vasodilators used in cardiac diseases                               | 5546        | 237113         | 242659       | 3                                          | 3                                          |
| 5  | C02                 | Antihypertensives                                                   | 6431        | 145949         | 152380       | 4                                          | 0                                          |
| 6  | C03                 | Diuretics                                                           | 34453       | 194633         | 229086       | 102                                        | 60                                         |
| 7  | C07                 | Beta blocking agents                                                | 31700       | 192324         | 224024       | 59                                         | 31                                         |
| 8  | C08                 | Calcium channel blockers                                            | 31904       | 172474         | 204378       | 104                                        | 51                                         |
| 9  | C09                 | Agents acting on the renin-angiotensin system                       | 62752       | 174778         | 237530       | 184                                        | 103                                        |
| 10 | C10AA               | HMG CoA reductase inhibitors                                        | 73475       | 216910         | 290385       | 97                                         | 55                                         |
| 11 | H03A                | Thyroid preparations                                                | 24832       | 280750         | 305582       | 132                                        | 76                                         |
| 12 | L04                 | Immunosuppressants                                                  | 3954        | 268648         | 272602       | 2                                          | 2                                          |
| 13 | M01A                | Anti-inflammatory and antirheumatic products, non-steroids          | 74150       | 90370          | 164520       | 6                                          | 1                                          |
| 14 | M05B                | Drugs affecting bone structure and mineralization                   | 7870        | 207798         | 215668       | 11                                         | 1                                          |
| 15 | N02A                | Opioids                                                             | 22982       | 55826          | 78808        | 3                                          | 0                                          |
| 16 | N02BA               | Salicylic acid and derivatives                                      | 61583       | 50427          | 112010       | 10                                         | 7                                          |
| 17 | N02BE               | Anilides                                                            | 83218       | 96592          | 179810       | 7                                          | 4                                          |
| 18 | N02C                | Antimigraine preparations                                           | 5521        | 114323         | 119844       | 13                                         | 6                                          |
| 19 | N06A                | Antidepressants                                                     | 33757       | 270405         | 304162       | 1                                          | 0                                          |
| 20 | R03A                | Adrenergics, inhalants                                              | 28880       | 147565         | 176445       | 56                                         | 35                                         |
| 21 | R03BA               | Glucocorticoids                                                     | 17352       | 188348         | 205700       | 19                                         | 15                                         |
| 22 | R06A                | Antihistamines for systemic use                                     | 13984       | 137652         | 151636       | 8                                          | 2                                          |
| 23 | S01E                | Antiglaucoma preparations and miotics                               | 5215        | 95653          | 100868       | 14                                         | 7                                          |

**Supplementary Table 2. Number of medication-associated independent loci that have been linked to diseases relevant to the medication.**

| # | Medication category           | No. of independent SNPs ( $P < 1E-8/23$ ) for that medication category | External                 |          |                                                                                                                                                                         |                                                                                                                                                                                                              |                                               |                                                                                                                                       | UKB                      |                                                                                                |                                               |
|---|-------------------------------|------------------------------------------------------------------------|--------------------------|----------|-------------------------------------------------------------------------------------------------------------------------------------------------------------------------|--------------------------------------------------------------------------------------------------------------------------------------------------------------------------------------------------------------|-----------------------------------------------|---------------------------------------------------------------------------------------------------------------------------------------|--------------------------|------------------------------------------------------------------------------------------------|-----------------------------------------------|
|   |                               |                                                                        | Related indication/trait | PMID     | Initial sample size <sup>a</sup>                                                                                                                                        | Replication sample size <sup>a</sup>                                                                                                                                                                         | No. of independent SNPs reported <sup>a</sup> | Number of medication-associated independent loci that have been previously linked to diseases relevant to the medication <sup>b</sup> | Related indication/trait | Number of medication-associated independent loci that are also associated with related disease | SNPs remain significant after mtCOJO analyses |
| 1 | A10: Drugs used in Diabetes   | 33                                                                     | Type 1 diabetes          | 19430480 | 7,514 European ancestry cases, 9,045 European ancestry controls                                                                                                         | 4,267 European ancestry cases, 4,670 European ancestry controls, 4,342 European ancestry trios from 2,319 families                                                                                           | 38                                            | 1                                                                                                                                     | Type 2 diabetes          | 32                                                                                             | rs9273364                                     |
|   |                               |                                                                        | Type 2 diabetes          | 28869590 | 6,353 South Asian ancestry cases, 7,179 South Asian ancestry controls, 3,871 European ancestry cases, 16,427 European ancestry controls, 34,840 cases, 114,981 controls | 7,888 South Asian ancestry cases, 20,679 South Asian ancestry controls, 387 European ancestry cases, 2,092 European ancestry controls, 19,998 East Asian ancestry cases, 30,983 East Asian ancestry controls | 157                                           | 23                                                                                                                                    |                          |                                                                                                |                                               |
| 2 | C03: Diuretics                | 60                                                                     | Hypertension             | 21909115 | 69,395 European ancestry individuals                                                                                                                                    | Up to 133,361 European ancestry individuals                                                                                                                                                                  | 11                                            | 7                                                                                                                                     | Hypertension             | 59                                                                                             | rs916880                                      |
|   |                               |                                                                        | Systolic blood pressure  | 28739976 | 150,134 European ancestry individuals                                                                                                                                   | 87,359 European ancestry individuals, 140,886 European and unknown ancestry individuals                                                                                                                      | 96                                            | 26                                                                                                                                    |                          |                                                                                                |                                               |
|   |                               |                                                                        | Diastolic blood pressure | 28135244 | 140,886 European ancestry individuals                                                                                                                                   | 190,318 European ancestry individuals                                                                                                                                                                        | 94                                            | 2                                                                                                                                     |                          |                                                                                                |                                               |
|   |                               |                                                                        | Pulse pressure           | 28135244 | 140,886 European ancestry individuals                                                                                                                                   | 190,318 European ancestry individuals                                                                                                                                                                        | 94                                            | 0                                                                                                                                     |                          |                                                                                                |                                               |
| 3 | C07: Beta blocking agents     | 31                                                                     | Hypertension             | 21909115 | 69,395 European ancestry individuals                                                                                                                                    | Up to 133,361 European ancestry individuals                                                                                                                                                                  | 11                                            | 5                                                                                                                                     | Hypertension             | 30                                                                                             | rs2891168                                     |
|   |                               |                                                                        | Systolic blood pressure  | 28739976 | 150,134 European ancestry individuals                                                                                                                                   | 87,359 European ancestry individuals, 140,886 European and unknown ancestry individuals                                                                                                                      | 96                                            | 14                                                                                                                                    |                          |                                                                                                |                                               |
|   |                               |                                                                        | Diastolic blood pressure | 28135244 | 140,886 European ancestry individuals                                                                                                                                   | 190,318 European ancestry individuals                                                                                                                                                                        | 94                                            | 2                                                                                                                                     |                          |                                                                                                |                                               |
|   |                               |                                                                        | Pulse pressure           | 28135244 | 140,886 European ancestry individuals                                                                                                                                   | 190,318 European ancestry individuals                                                                                                                                                                        | 94                                            | 1                                                                                                                                     |                          |                                                                                                |                                               |
| 4 | C08: Calcium channel blockers | 51                                                                     | Hypertension             | 21909115 | 69,395 European ancestry individuals                                                                                                                                    | Up to 133,361 European ancestry individuals                                                                                                                                                                  | 11                                            | 4                                                                                                                                     | Hypertension             | 50                                                                                             | rs7983337                                     |
|   |                               |                                                                        | Systolic blood pressure  | 28739976 | 150,134 European ancestry individuals                                                                                                                                   | 87,359 European ancestry individuals, 140,886 European and unknown ancestry individuals                                                                                                                      | 96                                            | 20                                                                                                                                    |                          |                                                                                                |                                               |
|   |                               |                                                                        | Diastolic blood pressure | 28135244 | 140,886 European ancestry individuals                                                                                                                                   | 190,318 European ancestry individuals                                                                                                                                                                        | 94                                            | 2                                                                                                                                     |                          |                                                                                                |                                               |
|   |                               |                                                                        | Pulse pressure           | 28135244 | 140,886 European ancestry individuals                                                                                                                                   | 190,318 European ancestry individuals                                                                                                                                                                        | 94                                            | 0                                                                                                                                     |                          |                                                                                                |                                               |

|    |                                                    |     |                               |          |                                                                                                                                                                                                                                           |                                                                                         |    |    |                      |     |                                 |
|----|----------------------------------------------------|-----|-------------------------------|----------|-------------------------------------------------------------------------------------------------------------------------------------------------------------------------------------------------------------------------------------------|-----------------------------------------------------------------------------------------|----|----|----------------------|-----|---------------------------------|
| 5  | C09: Agents acting on the renin-angiotensin system | 103 | Hypertension                  | 21909115 | 69,395 European ancestry individuals                                                                                                                                                                                                      | Up to 133,361 European ancestry individuals                                             | 11 | 7  | Hypertension         | 100 | rs4970834   rs10217586   rs7412 |
|    |                                                    |     | Systolic blood pressure       | 28739976 | 150,134 European ancestry individuals                                                                                                                                                                                                     | 87,359 European ancestry individuals, 140,886 European and unknown ancestry individuals | 96 | 32 |                      |     |                                 |
|    |                                                    |     | Diastolic blood pressure      | 28135244 | 140,886 European ancestry individuals                                                                                                                                                                                                     | 190,318 European ancestry individuals                                                   | 94 | 5  |                      |     |                                 |
|    |                                                    |     | Pulse pressure                | 28135244 | 140,886 European ancestry individuals                                                                                                                                                                                                     | 190,318 European ancestry individuals                                                   | 94 | 2  |                      |     |                                 |
| 6  | C10AA: HMG CoA reductase inhibitors                | 55  | LDL cholesterol               | 24097068 | 94,595 European ancestry individuals                                                                                                                                                                                                      | 93,982 European ancestry individuals                                                    | 58 | 19 | Hypercholesterolemia | 53  | rs7903146   rs1537371           |
|    |                                                    |     | HDL cholesterol               | 24097068 | 94,595 European ancestry individuals                                                                                                                                                                                                      | 93,982 European ancestry individuals                                                    | 71 | 9  |                      |     |                                 |
|    |                                                    |     | Cholesterol, total            | 24097068 | 94,595 European ancestry individuals                                                                                                                                                                                                      | 93,982 European ancestry individuals                                                    | 73 | 18 |                      |     |                                 |
|    |                                                    |     | Triglycerides                 | 24097068 | 94,595 European ancestry individuals                                                                                                                                                                                                      | 93,982 European ancestry individuals                                                    | 41 | 8  |                      |     |                                 |
| 7  | H03A: Thyroid preparations                         | 76  | Hypothyroidism                | 27182965 | 17,558 European ancestry cases, 117,083 European ancestry controls                                                                                                                                                                        | -                                                                                       | 26 | 11 | Hypothyroidism       | 76  | -                               |
| 8  | R03A: Adrenergics, inhalants                       | 35  | Asthma                        | 29273806 | 19,954 European ancestry cases, 107,715 European ancestry controls, 2,149 African ancestry cases, 6,055 African ancestry controls, 1,239 Japanese ancestry cases, 3,976 Japanese ancestry controls, 606 Latino cases, 792 Latino controls | -                                                                                       | 51 | 13 | Asthma               | 35  | -                               |
| 9  | R03BA: Glucocorticoids                             | 15  | Asthma                        | 29273806 | 19,954 European ancestry cases, 107,715 European ancestry controls, 2,149 African ancestry cases, 6,055 African ancestry controls, 1,239 Japanese ancestry cases, 3,976 Japanese ancestry controls, 606 Latino cases, 792 Latino controls | -                                                                                       | 51 | 8  | Asthma               | 15  | -                               |
| 10 | S01E: Antiglaucoma preparations and miotics        | 7   | Glaucoma (primary open-angle) | 25173105 | 1,155 European ancestry cases, 1,922 European ancestry controls                                                                                                                                                                           | 3,548 European ancestry cases, 9,496 European ancestry controls                         | 9  | 3  | Glaucoma             | 7   | -                               |
|    |                                                    |     | Intraocular pressure          | 28073927 | 25,916 European ancestry individuals, 1,073 Orcadian (founder/genetic isolate) individuals, 2,589 Erasmus Rucphen (founder/genetic isolate) individuals                                                                                   | 8,352 Asian ancestry individuals                                                        | 9  | 2  |                      |     |                                 |

<sup>a</sup> Information are derived from GWAS Catalog (<https://www.ebi.ac.uk/gwas/>).

<sup>b</sup> Analyses were performed using GCTA --cojo-cond function, together with medication-taking GWAS summary statistics and relevant indication/trait associated independent SNPs as input. Number of independent medication-associated SNPs which are not significant after the analyses are counted.

**Supplementary Table 3. Downloaded GWAS summary statistics for further analysis.**

| Trait                                       | Title                                                                                                                                       | Title URL                                                                                                                                   | Published year | PMID     | Genetic correlation analysis | Genetic risk score analysis | Mendelian Randomization analysis | Note                     |
|---------------------------------------------|---------------------------------------------------------------------------------------------------------------------------------------------|---------------------------------------------------------------------------------------------------------------------------------------------|----------------|----------|------------------------------|-----------------------------|----------------------------------|--------------------------|
| Body mass index (BMI)                       | Genetic studies of body mass index yield new insights for obesity biology                                                                   | <a href="https://www.nature.com/articles/nature14177">https://www.nature.com/articles/nature14177</a>                                       | 2015           | 25673413 | ✓                            |                             | ✓                                |                          |
| Educational attainment (EA)                 | Genome-wide association study identifies 74 loci associated with educational attainment                                                     | <a href="https://www.nature.com/articles/nature17671">https://www.nature.com/articles/nature17671</a>                                       | 2016           | 27225129 | ✓                            |                             |                                  |                          |
| Ever vs never smoked                        | Genome-wide meta-analyses identify multiple loci associated with smoking behavior                                                           | <a href="https://www.nature.com/articles/ng.571">https://www.nature.com/articles/ng.571</a>                                                 | 2010           | 20418890 | ✓                            |                             |                                  |                          |
| Former vs current smoker                    |                                                                                                                                             |                                                                                                                                             |                |          | ✓                            |                             |                                  |                          |
| Type 2 diabetes (T2D)                       | Large-scale association analysis provides insights into the genetic architecture and pathophysiology of type 2 diabetes                     | <a href="https://www.nature.com/articles/ng.2383">https://www.nature.com/articles/ng.2383</a>                                               | 2012           | 22885922 | ✓                            | ✓                           | ✓                                |                          |
| High-density lipoprotein cholesterol (HDLc) | Discovery and refinement of loci associated with lipid levels                                                                               | <a href="https://www.nature.com/articles/ng.2797">https://www.nature.com/articles/ng.2797</a>                                               | 2013           | 24097068 | ✓                            |                             | ✓                                |                          |
| Low-density lipoprotein cholesterol (LDLc)  |                                                                                                                                             |                                                                                                                                             |                |          | ✓                            | ✓                           | ✓                                |                          |
| Total cholesterol (TC)                      |                                                                                                                                             |                                                                                                                                             |                |          | ✓                            |                             | ✓                                |                          |
| Triglycerides (TG)                          |                                                                                                                                             |                                                                                                                                             |                |          | ✓                            |                             | ✓                                |                          |
| Coronary artery disease (CAD)               | Large-scale association analysis identifies 13 new susceptibility loci for coronary artery disease                                          | <a href="https://www.nature.com/articles/ng.784">https://www.nature.com/articles/ng.784</a>                                                 | 2011           | 21378990 | ✓                            |                             | ✓                                |                          |
| Systolic blood pressure (SBP)               | Novel blood pressure locus and gene discovery using genome-wide association study and expression data sets from blood and the kidney        | <a href="http://hvp.eurpub.org/content/hypertensionaha/70/3/e4.full.pdf">http://hvp.eurpub.org/content/hypertensionaha/70/3/e4.full.pdf</a> | 2017           | 28739976 | ✓                            | ✓                           | ✓                                |                          |
| Diastolic blood pressure (DBP)              |                                                                                                                                             |                                                                                                                                             |                |          | ✓                            |                             | ✓                                |                          |
| Pulse pressure (PP)                         |                                                                                                                                             |                                                                                                                                             |                |          | ✓                            |                             | ✓                                |                          |
| Rheumatoid arthritis (RA)                   | Genetics of rheumatoid arthritis contributes to biology and drug discovery                                                                  | <a href="https://www.nature.com/articles/nature12873">https://www.nature.com/articles/nature12873</a>                                       | 2014           | 24390342 | ✓                            | ✓                           | ✓                                |                          |
| Forearm bone mineral density                | Whole-genome sequencing identifies EN1 as a determinant of bone density and fracture                                                        | <a href="https://www.nature.com/articles/nature14878">https://www.nature.com/articles/nature14878</a>                                       | 2015           | 26367794 | ✓                            |                             |                                  |                          |
| Femoral neck bone mineral density           |                                                                                                                                             |                                                                                                                                             |                |          | ✓                            | ✓                           | ✓                                |                          |
| Lumbar spine bone mineral density           |                                                                                                                                             |                                                                                                                                             |                |          | ✓                            |                             | ✓                                |                          |
| Migraine                                    | Meta-analysis of 375,000 individuals identifies 38 susceptibility loci for migraine                                                         | <a href="https://www.nature.com/articles/ng.3598">https://www.nature.com/articles/ng.3598</a>                                               | 2016           | 27322543 |                              | ✓                           |                                  |                          |
| Major depression (MD)                       | Genome-wide association analyses identify 44 risk variants and refine the genetic architecture of major depression                          | <a href="https://www.nature.com/articles/s41588-018-0090-3">https://www.nature.com/articles/s41588-018-0090-3</a>                           | 2018           | 29700475 | ✓                            | ✓                           | ✓                                | Excluding the UKB cohort |
| Neuroticism                                 | Genetic variants associated with subjective well-being, depressive symptoms, and neuroticism identified through genome-wide analyses        | <a href="https://www.nature.com/articles/ng.3552">https://www.nature.com/articles/ng.3552</a>                                               | 2016           | 27089181 | ✓                            |                             |                                  |                          |
| Asthma                                      | Multi-ancestry association study identifies new asthma risk loci that colocalize with immune-cell enhancer marks                            | <a href="https://www.nature.com/articles/s41588-017-0014-7">https://www.nature.com/articles/s41588-017-0014-7</a>                           | 2018           | 29273806 | ✓                            | ✓                           | ✓                                |                          |
| Intraocular pressure (IOP)                  | New insights into the genetics of primary open-angle glaucoma based on meta-analyses of intraocular pressure and optic disc characteristics | <a href="https://academic.oup.com/hmg/article/26/2/438/2970289">https://academic.oup.com/hmg/article/26/2/438/2970289</a>                   | 2017           | 28073927 | ✓                            |                             |                                  |                          |

**Supplementary Table 4. Results of genetic risk score of 8 diseases/traits for 9 medication-taking phenotypes.**

| Discovery trait <sup>a</sup>                         | Target trait                                            | Prediction P value range | Target sample size | Proportion of cases | Nagelkerke R <sup>2</sup> | P value  | AUC   | OR <sub>10</sub> <sup>b</sup> | OR <sub>10</sub> CI <sup>c</sup> |
|------------------------------------------------------|---------------------------------------------------------|--------------------------|--------------------|---------------------|---------------------------|----------|-------|-------------------------------|----------------------------------|
| Type 2 diabetes (T2D)                                | A10: Drugs used in diabetes                             | 0-5.00E-08               | 305913             | 0.050               | 0.012                     | 8.0E-267 | 0.581 | 2.78                          | 2.57-3.00                        |
|                                                      |                                                         | 0-1.00E-05               |                    |                     | 0.014                     | 4.7E-311 | 0.588 | 3.10                          | 2.86-3.36                        |
|                                                      |                                                         | 0-1.00E-04               |                    |                     | 0.012                     | 6.1E-265 | 0.581 | 2.75                          | 2.55-2.98                        |
|                                                      |                                                         | 0-1.00E-03               |                    |                     | 0.009                     | 2.5E-199 | 0.570 | 2.40                          | 2.23-2.59                        |
|                                                      |                                                         | 0-1.00E-02               |                    |                     | 0.007                     | 2.8E-159 | 0.563 | 2.19                          | 2.03-2.37                        |
|                                                      |                                                         | 0-5.00E-02               |                    |                     | 0.007                     | 2.1E-158 | 0.563 | 2.23                          | 2.07-2.41                        |
|                                                      |                                                         | 0-1.00E-01               |                    |                     | 0.007                     | 7.3E-144 | 0.560 | 2.24                          | 2.07-2.42                        |
| 0-5.00E-01                                           | 0.006                                                   | 5.8E-140                 | 0.559              | 2.25                | 2.08-2.43                 |          |       |                               |                                  |
| Systolic blood pressure (SBP)                        | C09: Agents acting on the renin-angiotensin system      | 0-5.00E-08               | 237530             | 0.264               | 0.017                     | 0.0E+00  | 0.568 | 2.39                          | 2.29-2.49                        |
|                                                      |                                                         | 0-1.00E-05               |                    |                     | 0.023                     | 0.0E+00  | 0.580 | 2.67                          | 2.56-2.79                        |
|                                                      |                                                         | 0-1.00E-04               |                    |                     | 0.023                     | 0.0E+00  | 0.580 | 2.70                          | 2.59-2.82                        |
|                                                      |                                                         | 0-1.00E-03               |                    |                     | 0.023                     | 0.0E+00  | 0.580 | 2.80                          | 2.68-2.92                        |
|                                                      |                                                         | 0-1.00E-02               |                    |                     | 0.021                     | 0.0E+00  | 0.578 | 2.67                          | 2.56-2.78                        |
|                                                      |                                                         | 0-5.00E-02               |                    |                     | 0.019                     | 0.0E+00  | 0.577 | 2.60                          | 2.49-2.71                        |
|                                                      |                                                         | 0-1.00E-01               |                    |                     | 0.018                     | 0.0E+00  | 0.576 | 2.51                          | 2.41-2.62                        |
| 0-5.00E-01                                           | 0.016                                                   | 0.0E+00                  | 0.573              | 2.39                | 2.29-2.49                 |          |       |                               |                                  |
| Low-density lipoprotein cholesterol (LDLC)           | C10AA: HMG CoA reductase inhibitors                     | 0-5.00E-08               | 290385             | 0.253               | 0.013                     | 0.0E+00  | 0.560 | 2.20                          | 2.11-2.28                        |
|                                                      |                                                         | 0-1.00E-05               |                    |                     | 0.011                     | 0.0E+00  | 0.557 | 2.08                          | 2.00-2.17                        |
|                                                      |                                                         | 0-1.00E-04               |                    |                     | 0.010                     | 0.0E+00  | 0.553 | 1.91                          | 1.84-1.98                        |
|                                                      |                                                         | 0-1.00E-03               |                    |                     | 0.006                     | 4.2E-262 | 0.541 | 1.69                          | 1.63-1.76                        |
|                                                      |                                                         | 0-1.00E-02               |                    |                     | 0.003                     | 2.9E-129 | 0.529 | 1.42                          | 1.37-1.48                        |
|                                                      |                                                         | 0-5.00E-02               |                    |                     | 0.002                     | 4.5E-89  | 0.524 | 1.34                          | 1.29-1.39                        |
|                                                      |                                                         | 0-1.00E-01               |                    |                     | 0.002                     | 4.1E-77  | 0.523 | 1.32                          | 1.27-1.37                        |
| 0-5.00E-01                                           | 0.001                                                   | 2.4E-61                  | 0.520              | 1.30                | 1.25-1.35                 |          |       |                               |                                  |
| Rheumatoid arthritis (RA)                            | L04: Immunosuppressants                                 | 0-5.00E-08               | 272602             | 0.015               | 0.011                     | 3.2E-93  | 0.586 | 3.18                          | 2.74-3.68                        |
|                                                      |                                                         | 0-1.00E-05               |                    |                     | 0.012                     | 2.3E-100 | 0.589 | 3.23                          | 2.79-3.75                        |
|                                                      |                                                         | 0-1.00E-04               |                    |                     | 0.012                     | 1.1E-102 | 0.590 | 3.47                          | 2.99-4.04                        |
|                                                      |                                                         | 0-1.00E-03               |                    |                     | 0.013                     | 1.3E-108 | 0.593 | 3.34                          | 2.88-3.88                        |
|                                                      |                                                         | 0-1.00E-02               |                    |                     | 0.012                     | 2.2E-104 | 0.593 | 3.28                          | 2.83-3.80                        |
|                                                      |                                                         | 0-5.00E-02               |                    |                     | 0.010                     | 2.9E-83  | 0.583 | 2.90                          | 2.51-3.35                        |
|                                                      |                                                         | 0-1.00E-01               |                    |                     | 0.008                     | 3.3E-67  | 0.573 | 2.52                          | 2.19-2.91                        |
| 0-5.00E-01                                           | 0.006                                                   | 4.9E-52                  | 0.563              | 2.28                | 1.99-2.63                 |          |       |                               |                                  |
| Femoral neck bone mineral density (BMD) <sup>d</sup> | M05B: Drugs affecting bone structure and mineralization | 0-5.00E-08               | 215668             | 0.036               | 0.005                     | 6.5E-70  | 0.558 | 2.09                          | 1.88-2.32                        |
|                                                      |                                                         | 0-1.00E-05               |                    |                     | 0.007                     | 2.5E-93  | 0.568 | 2.26                          | 2.04-2.51                        |
|                                                      |                                                         | 0-1.00E-04               |                    |                     | 0.005                     | 1.3E-62  | 0.555 | 1.88                          | 1.69-2.08                        |
|                                                      |                                                         | 0-1.00E-03               |                    |                     | 0.004                     | 2.7E-52  | 0.548 | 1.93                          | 1.74-2.14                        |
|                                                      |                                                         | 0-1.00E-02               |                    |                     | 0.004                     | 1.1E-48  | 0.548 | 1.74                          | 1.57-1.93                        |
|                                                      |                                                         | 0-5.00E-02               |                    |                     | 0.004                     | 4.7E-49  | 0.547 | 1.85                          | 1.67-2.05                        |
|                                                      |                                                         | 0-1.00E-01               |                    |                     | 0.004                     | 1.9E-48  | 0.546 | 1.83                          | 1.66-2.03                        |
| 0-5.00E-01                                           | 0.004                                                   | 4.6E-47                  | 0.546              | 1.76                | 1.59-1.95                 |          |       |                               |                                  |
| Migraine                                             | N02C: Antimigraine preparations                         | 0-5.00E-08               | 119844             | 0.046               | 0.012                     | 5.1E-102 | 0.584 | 2.61                          | 2.30-2.96                        |
|                                                      |                                                         | 0-1.00E-05               |                    |                     | 0.013                     | 9.1E-110 | 0.585 | 3.08                          | 2.70-3.51                        |
| Major depression (MD)                                | N06A: Antidepressants                                   | 0-5.00E-08               | 304162             | 0.111               | 0.001                     | 7.6E-24  | 0.517 | 1.18                          | 1.13-1.25                        |
|                                                      |                                                         | 0-1.00E-05               |                    |                     | 0.002                     | 5.7E-54  | 0.525 | 1.39                          | 1.32-1.47                        |
|                                                      |                                                         | 0-1.00E-04               |                    |                     | 0.002                     | 5.0E-62  | 0.528 | 1.36                          | 1.29-1.43                        |
|                                                      |                                                         | 0-1.00E-03               |                    |                     | 0.003                     | 6.9E-101 | 0.535 | 1.55                          | 1.48-1.64                        |
|                                                      |                                                         | 0-1.00E-02               |                    |                     | 0.004                     | 4.9E-120 | 0.539 | 1.55                          | 1.48-1.64                        |
|                                                      |                                                         | 0-5.00E-02               |                    |                     | 0.004                     | 5.7E-134 | 0.540 | 1.70                          | 1.61-1.79                        |
|                                                      |                                                         | 0-1.00E-01               |                    |                     | 0.004                     | 1.6E-128 | 0.540 | 1.67                          | 1.59-1.76                        |
| 0-5.00E-01                                           | 0.004                                                   | 2.5E-134                 | 0.540              | 1.67                | 1.59-1.76                 |          |       |                               |                                  |
| Asthma                                               | R03A: Adrenergics inhalants                             | 0-5.00E-08               | 176445             | 0.164               | 0.013                     | 1.6E-300 | 0.567 | 2.27                          | 2.15-2.41                        |
|                                                      |                                                         | 0-1.00E-05               |                    |                     | 0.013                     | 1.6E-301 | 0.567 | 2.29                          | 2.16-2.43                        |
|                                                      |                                                         | 0-1.00E-04               |                    |                     | 0.013                     | 1.8E-305 | 0.568 | 2.26                          | 2.13-2.39                        |
|                                                      |                                                         | 0-1.00E-03               |                    |                     | 0.012                     | 2.0E-277 | 0.565 | 2.25                          | 2.12-2.38                        |
|                                                      |                                                         | 0-1.00E-02               |                    |                     | 0.011                     | 4.1E-251 | 0.560 | 2.19                          | 2.07-2.32                        |
|                                                      |                                                         | 0-5.00E-02               |                    |                     | 0.010                     | 7.6E-228 | 0.558 | 2.08                          | 1.96-2.20                        |
|                                                      |                                                         | 0-1.00E-01               |                    |                     | 0.009                     | 3.2E-214 | 0.557 | 1.93                          | 1.82-2.04                        |
| 0-5.00E-01                                           | 0.009                                                   | 1.3E-201                 | 0.555              | 2.00                | 1.89-2.12                 |          |       |                               |                                  |
| Asthma                                               | R03BA: Glucocorticoid                                   | 0-5.00E-08               | 205700             | 0.084               | 0.009                     | 1.7E-172 | 0.562 | 2.21                          | 2.05-2.37                        |
|                                                      |                                                         | 0-1.00E-05               |                    |                     | 0.008                     | 3.5E-162 | 0.561 | 2.11                          | 1.97-2.27                        |
|                                                      |                                                         | 0-1.00E-04               |                    |                     | 0.008                     | 8.5E-167 | 0.562 | 2.00                          | 1.86-2.14                        |
|                                                      |                                                         | 0-1.00E-03               |                    |                     | 0.007                     | 1.9E-145 | 0.557 | 1.96                          | 1.82-2.10                        |
|                                                      |                                                         | 0-1.00E-02               |                    |                     | 0.006                     | 3.0E-122 | 0.551 | 2.01                          | 1.87-2.16                        |
|                                                      |                                                         | 0-5.00E-02               |                    |                     | 0.006                     | 2.7E-111 | 0.549 | 1.87                          | 1.74-2.01                        |
|                                                      |                                                         | 0-1.00E-01               |                    |                     | 0.005                     | 2.0E-102 | 0.548 | 1.77                          | 1.65-1.90                        |
| 0-5.00E-01                                           | 0.005                                                   | 1.5E-91                  | 0.546              | 1.74                | 1.62-1.86                 |          |       |                               |                                  |

<sup>a</sup> For each discovery trait, the data are used from **Supplementary Table 3**.

<sup>b</sup> The odds ratio of taking medications for participants with genetic risk score at 10<sup>th</sup> decile compared with participants with genetic risk score at 1<sup>st</sup> decile.

<sup>c</sup> Confidence interval for the odds ratio at 10<sup>th</sup> decile.

<sup>d</sup> Effect size for each SNP from published GWAS summary statistics are changed into reverse direction.

**Supplementary Table 5. The SNP-based heritability ( $h^2$ ) of the 23 medication-taking traits, representing the proportion of variance of the case/control individuals in the UK Biobank attributable to genome-wide SNPs.**

| Medication category | $h^2$ | $h^2$ SE | $h^2$ liability <sup>a</sup> | $h^2$ SE liability <sup>a</sup> | Lambda GC | Mean Chi <sup>2</sup> | Intercept | Intercept SE | Ratio | Ratio SE | No. of case | No. of control |
|---------------------|-------|----------|------------------------------|---------------------------------|-----------|-----------------------|-----------|--------------|-------|----------|-------------|----------------|
| A02B                | 0.09  | 0.005    | 0.149                        | 0.008                           | 1.25      | 1.26                  | 1.02      | 0.008        | 0.09  | 0.029    | 53137       | 79230          |
| A10                 | 0.05  | 0.003    | 0.203                        | 0.014                           | 1.25      | 1.32                  | 1.04      | 0.010        | 0.12  | 0.030    | 15272       | 290641         |
| B01A                | 0.05  | 0.004    | 0.084                        | 0.007                           | 1.15      | 1.18                  | 1.02      | 0.007        | 0.10  | 0.042    | 67653       | 85986          |
| C01D                | 0.01  | 0.002    | 0.115                        | 0.018                           | 1.10      | 1.09                  | 1.02      | 0.007        | 0.24  | 0.077    | 5546        | 237113         |
| C02                 | 0.02  | 0.004    | 0.109                        | 0.019                           | 1.10      | 1.08                  | 1.02      | 0.008        | 0.25  | 0.090    | 6431        | 145949         |
| C03                 | 0.10  | 0.006    | 0.231                        | 0.014                           | 1.37      | 1.53                  | 1.05      | 0.012        | 0.10  | 0.022    | 34453       | 194633         |
| C07                 | 0.07  | 0.004    | 0.160                        | 0.011                           | 1.25      | 1.33                  | 1.04      | 0.010        | 0.11  | 0.029    | 31700       | 192324         |
| C08                 | 0.11  | 0.006    | 0.242                        | 0.013                           | 1.37      | 1.49                  | 1.05      | 0.010        | 0.10  | 0.021    | 31904       | 172474         |
| C09                 | 0.13  | 0.006    | 0.238                        | 0.011                           | 1.49      | 1.72                  | 1.09      | 0.012        | 0.12  | 0.017    | 62752       | 174778         |
| C10AA               | 0.07  | 0.006    | 0.136                        | 0.010                           | 1.31      | 1.46                  | 1.05      | 0.011        | 0.10  | 0.023    | 73475       | 216910         |
| H03A                | 0.07  | 0.006    | 0.218                        | 0.020                           | 1.25      | 1.49                  | 1.06      | 0.013        | 0.13  | 0.027    | 24832       | 280750         |
| L04                 | 0.01  | 0.002    | 0.079                        | 0.025                           | 1.05      | 1.04                  | 1.01      | 0.006        | 0.18  | 0.162    | 3954        | 268648         |
| M01A                | 0.06  | 0.004    | 0.093                        | 0.007                           | 1.20      | 1.21                  | 1.02      | 0.008        | 0.09  | 0.036    | 74150       | 90370          |
| M05B                | 0.02  | 0.003    | 0.110                        | 0.014                           | 1.10      | 1.10                  | 1.01      | 0.008        | 0.09  | 0.076    | 7870        | 207798         |
| N02A                | 0.15  | 0.008    | 0.256                        | 0.015                           | 1.20      | 1.25                  | 1.02      | 0.008        | 0.07  | 0.031    | 22982       | 55826          |
| N02BA               | 0.06  | 0.005    | 0.088                        | 0.009                           | 1.10      | 1.14                  | 1.01      | 0.007        | 0.09  | 0.054    | 61583       | 50427          |
| N02BE               | 0.06  | 0.004    | 0.098                        | 0.006                           | 1.20      | 1.25                  | 1.02      | 0.008        | 0.09  | 0.032    | 83218       | 96592          |
| N02C                | 0.05  | 0.005    | 0.202                        | 0.024                           | 1.10      | 1.11                  | 1.00      | 0.007        | <0    | -        | 5521        | 114323         |
| N06A                | 0.03  | 0.002    | 0.072                        | 0.006                           | 1.15      | 1.17                  | 1.01      | 0.007        | 0.07  | 0.044    | 33757       | 270405         |
| R03A                | 0.08  | 0.006    | 0.179                        | 0.014                           | 1.20      | 1.31                  | 1.03      | 0.009        | 0.10  | 0.030    | 28880       | 147565         |
| R03BA               | 0.03  | 0.004    | 0.114                        | 0.012                           | 1.15      | 1.17                  | 1.03      | 0.008        | 0.17  | 0.048    | 17352       | 188348         |
| R06A                | 0.03  | 0.004    | 0.100                        | 0.011                           | 1.10      | 1.11                  | 1.01      | 0.007        | 0.05  | 0.064    | 13984       | 137652         |
| S01E                | 0.05  | 0.006    | 0.235                        | 0.028                           | 1.10      | 1.12                  | 1.01      | 0.007        | 0.06  | 0.062    | 5215        | 95653          |

<sup>a</sup> The  $h^2$  on the sample scale has phenotypic variance approximately  $P * (1 - P)$ , where  $P$  is the proportion of the sample that takes the medication. We note that  $h^2$  increases with  $P$ . Transformation to the liability scale assumes that the population risk of taking the medication,  $K$  is the same as the sample risk  $P$ ,  $K = P$ . The transformation to the liability scale assumes an underlying normally distributed phenotype of liability to medication-taking.

**Supplementary Table 6. Identified medication category associated-genes encoding therapeutic-effect targets for treating indications relevant to medications from corresponding medication category <sup>a</sup>.**

| Gene    | Medication categories | Protein name                                                         | Drug (the first 4 ATC level)                                                                                                                                   | Mechanism of action                                                                              |
|---------|-----------------------|----------------------------------------------------------------------|----------------------------------------------------------------------------------------------------------------------------------------------------------------|--------------------------------------------------------------------------------------------------|
| NDUFS3  | A10                   | NADH dehydrogenase [ubiquinone] iron-sulfur protein 3, mitochondrial | Metformin (A10BA)                                                                                                                                              | Mitochondrial complex I (NADH dehydrogenase) inhibitor                                           |
| KCNJ11  | A10                   | ATP-sensitive inward rectifier potassium channel 11                  | Acetohexamide  Chlorpropamide  Glimepiride  Glipizide  Glyburide  Tolazamide  Tolbutamide  Nateglinide  Repaglinide (A10BB  A10BX)                             | Sulfonylurea receptor 1, Kir6.2 blocker                                                          |
| PPARG   | A10                   | Peroxisome proliferator-activated receptor gamma                     | Pioglitazone  Rosiglitazone  Troglitazone (A10BG)                                                                                                              | Peroxisome proliferator-activated receptor gamma agonist                                         |
| KCNH2   | C07                   | Potassium voltage-gated channel subfamily H member 2                 | Sotalol (C07AA)                                                                                                                                                | HERG blocker                                                                                     |
| CACNA1D | C08                   | Voltage-dependent L-type calcium channel subunit alpha-1D            | Amlodipine  Clevidipine  Felodipine  Isradipine  Nicardipine  Nifedipine  Nimodipine  Nisoldipine  Verapamil  Diltiazem  Bepridil (C08CA  C08DA  C08DB  C08EA) | Voltage-gated L-type calcium channel blocker, Voltage-gated calcium channel blocker              |
| CACNB2  | C08                   | Voltage-dependent L-type calcium channel subunit beta-2              | Bepridil (C08EA)                                                                                                                                               | Voltage-gated calcium channel blocker                                                            |
| ACE     | C09                   | Angiotensin-converting enzyme                                        | Benazepril  Captopril  Enalapril  Fosinopril  Lisinopril  Moexipril  Perindopril  Quinapril  Ramipril  Spirapril  Trandolapril (C09AA)                         | Angiotensin-converting enzyme inhibitor                                                          |
| HMGCR   | C10AA                 | 3-hydroxy-3-methylglutaryl-coenzyme A reductase                      | Atorvastatin  Cerivastatin  Fluvastatin  Lovastatin  Pitavastatin  Pravastatin  Rosuvastatin  Simvastatin (C10AA)                                              | HMG-CoA reductase inhibitor                                                                      |
| TNF     | L04                   | Tumor necrosis factor                                                | Adalimumab  Certolizumab pegol  Etanercept  Golimumab  Infliximab (L04AB)                                                                                      | TNF-alpha inhibitor                                                                              |
| GUCY1B3 | C08                   | Guanylate cyclase soluble subunit beta-1                             | Nitroprusside  Riociguat (C02DD  C02KX)                                                                                                                        | Soluble guanylate cyclase activator, Soluble guanylate cyclase positive allosteric modulator     |
| GUCY1A3 | C08                   | Guanylate cyclase soluble subunit alpha-3                            | Riociguat (C02KX)                                                                                                                                              | Soluble guanylate cyclase positive allosteric modulator                                          |
| PCSK9   | C10AA                 | Proprotein convertase subtilisin/kexin type 9                        | Alirocumab  Evolocumab (C10AX)                                                                                                                                 | Subtilisin/kexin type 9 inhibitor                                                                |
| NPC1L1  | C10AA                 | Niemann-Pick C1-like protein 1                                       | Ezetimibe (C10AX)                                                                                                                                              | Niemann-Pick C1-like protein 1 inhibitor                                                         |
| ABCA1   | C10AA                 | ATP-binding cassette sub-family A member 1                           | Probucol (C10AX)                                                                                                                                               | ATP-binding cassette sub-family A member 1 inhibitor                                             |
| TRPM8   | N02BE, N02C           | Transient receptor potential cation channel subfamily M member 8     | Menthol                                                                                                                                                        | Transient receptor potential cation channel subfamily A member 1 and subfamily M member 8 opener |
| IL5     | R03A                  | Interleukin-5                                                        | Reslizumab  Mepolizumab (R03DX)                                                                                                                                | Interleukin-5 inhibitor                                                                          |

<sup>a</sup> Contents above bold black line show the therapeutic effect target genes for medications classified in the medication category while contents below bold black line show the therapeutic effect target genes for treating indications relevant to medications from corresponding medication category.

**Supplementary Table 7. Therapeutic effect target genes for drugs ever or currently in clinical trial for the treatment of diseases corresponding to each medication category.**

| Gene    | Medication categories | Protein name                         | Drug         | Mechanism of action                             | Indication             | Phase of clinical trial | Clinical trial identifier |
|---------|-----------------------|--------------------------------------|--------------|-------------------------------------------------|------------------------|-------------------------|---------------------------|
| CYP11B2 | C03; C08; C09         | Cytochrome P450 11B2                 | Osilodrostat | Aldosterone synthase inhibitor                  | Essential Hypertension | 2                       | NCT00758524               |
| EDNRA   | C09                   | Endothelin receptor ET-A             | Darusentan   | Endothelin receptor ET-A antagonist             | Hypertension           | 3                       | NCT00330369               |
| CETP    | B01A; C10AA           | Cholesteryl ester transfer protein   | Anacetrapib  | Cholesteryl ester transfer protein inhibitor    | Hypercholesterolemia   | 3                       | NCT01860729               |
| IL4     | R03A                  | Interleukin-4                        | Pascolizumab | Interleukin-4 inhibitor                         | Asthma                 | 2                       | NCT00024544               |
| IL4R    | R03A; R03BA           | Interleukin-4 receptor subunit alpha | Dupilumab    | Interleukin-4 receptor subunit alpha antagonist | Asthma                 | 3                       | NCT02414854               |
| IL13    | R03A; R03BA           | Interleukin-13                       | Lebrikizumab | Interleukin-13 inhibitor                        | Asthma                 | 3                       | NCT02104674               |
| TSLP    | R03A; R03BA; R06A     | Thymic stromal lymphopoietin         | Tezepelumab  | Thymic stromal lymphopoietin inhibitor          | Asthma                 | 3                       | NCT03347279               |
| TNF     | R03A; R03BA           | Tumor necrosis factor                | Etanercept   | TNF-alpha inhibitor                             | Asthma                 | 2                       | NCT00141791               |



**Supplementary Table 8. Connectivity score between the signature of perturbagen and knock-down gene.**

| A10 <sup>a</sup> |            | Cell line                    |       |        |        |      |       |       |
|------------------|------------|------------------------------|-------|--------|--------|------|-------|-------|
|                  |            | PC3                          | VCAP  | HCC515 | HCC515 | HT29 | VCAP  | HT29  |
|                  |            | Medication name <sup>b</sup> |       |        |        |      |       |       |
| Knock-down gene  | <i>IDE</i> | 95.63 <sup>c</sup>           | 91.23 | 95.18  | 92.69  | 90.6 | 96.27 | 94.76 |

| C09 <sup>a</sup> |            | Cell line       |       |       |       |       |       |        |       |
|------------------|------------|-----------------|-------|-------|-------|-------|-------|--------|-------|
|                  |            | HEPG2           | MCF7  | PC3   | HEPG2 | A549  | HA1E  | HCC515 | PC3   |
|                  |            | Medication name |       |       |       |       |       |        |       |
| Knock-down gene  | <i>AGT</i> | 96.69           | 93.69 | 98.14 | 97.57 | 93.37 | 95.77 | 91.36  | 93.37 |

<sup>a</sup> Code in the cell represents medication category.

<sup>b</sup> Text in the next line represent medications from the medication category.

<sup>c</sup> Connectivity scores between the signature of perturbagen and knock-down gene in different cell lines are derived from Touchstone tool (<https://clue.io/touchstone>) on Feb 24, 2019. As recommended, scores > 90 are strong scores to be considered as hypotheses for further study.

*IDE* (Entrez ID: 3416) was associated with taking A10 medications (diabetes drugs) in our analyses and the inhibitor of insulin-degrading enzyme (encoded by *IDE*) has shown anti-diabetic activity (Majanti *et al*, 2014). *AGT* (Entrez ID: 183) was associated with taking C07 (beta-blockers) and C09 (renin-angiotensin agents) and a liver-selective angiotensinogen inhibitor from a recent study shows improvements in efficacy and tolerability on hypertension (Mullick *et al*, 2017). Since inhibition of insulin-degrading enzyme (encoded by *IDE*) and angiotensinogen (encoded by *AGT*) showed medication category relevant therapeutic effects, we also used the CLUE Touchstone tool (<https://clue.io/touchstone>) (Subramanian *et al*, 2017) to check the correlation between signatures of medication-taking from their corresponding medication category and knocking down the *IDE* and *AGT* gene in different cell lines. *IDE* and *AGT* showed a high correlation (using the criterion of Connectivity score > 90 as recommended by CLUE Connectopedia) with corresponding medication categories (above), suggesting that these genes may be involved in how these medications exert effect or in the etiology of medication-related diseases.

Maianti JP, McFedries A, Foda ZH, et al. Anti-diabetic activity of insulin-degrading enzyme inhibitors mediated by multiple hormones. *Nature* 2014;511:94.

Mullick AE, Yeh ST, Graham MJ, Engelhardt JA, Prakash TP, Crooke RM. Blood Pressure Lowering and Safety Improvements With Liver Angiotensinogen Inhibition in Models of Hypertension and Kidney Injury. *Hypertension* 2017;70:566.

Subramanian A, Narayan R, Corsello SM, et al. A Next Generation Connectivity Map: L1000 Platform and the First 1,000,000 Profiles. *Cell* 2017;171:1437-52.e17.

**Supplementary Table 9. Number of individuals diagnosed with drug induced adverse side effect from UKB ICD10 classification (Data field: 41202 and 41204).**

| ICD10 Coding <sup>a</sup> | Meaning <sup>a</sup>                                 | Number of Main <sup>b</sup> | Number of Secondary <sup>c</sup> |
|---------------------------|------------------------------------------------------|-----------------------------|----------------------------------|
| D521                      | Drug-induced folate deficiency anaemia               | 0                           | 0                                |
| D590                      | Drug-induced autoimmune haemolytic anaemia           | 6                           | 4                                |
| D592                      | Drug-induced nonautoimmune haemolytic anaemia        | 3                           | 1                                |
| D611                      | Drug-induced aplastic anaemia                        | 7                           | 23                               |
| E064                      | Drug-induced thyroiditis                             | 1                           | 1                                |
| E160                      | Drug-induced hypoglycaemia without coma              | 32                          | 28                               |
| E231                      | Drug-induced hypopituitarism                         | 1                           | 2                                |
| E242                      | Drug-induced Cushing's syndrome                      | 4                           | 27                               |
| E273                      | Drug-induced adrenocortical insufficiency            | 15                          | 24                               |
| E661                      | Drug-induced obesity                                 | 0                           | 2                                |
| G211                      | Other drug-induced secondary parkinsonism            | 3                           | 12                               |
| G240                      | Drug-induced dystonia                                | 6                           | 5                                |
| G251                      | Drug-induced tremor                                  | 6                           | 13                               |
| G254                      | Drug-induced chorea                                  | 0                           | 0                                |
| G256                      | Drug-induced tics and other tics of organic origin   | 0                           | 0                                |
| G444                      | Drug-induced headache, not elsewhere classified      | 31                          | 23                               |
| G620                      | Drug-induced polyneuropathy                          | 5                           | 70                               |
| G720                      | Drug-induced myopathy                                | 8                           | 26                               |
| H263                      | Drug-induced cataract                                | 12                          | 2                                |
| J702                      | Acute drug-induced interstitial lung disorders       | 1                           | 0                                |
| J703                      | Chronic drug-induced interstitial lung disorders     | 2                           | 0                                |
| J704                      | Drug-induced interstitial lung disorder, unspecified | 5                           | 7                                |
| K853                      | Drug-induced acute pancreatitis                      | 7                           | 2                                |
| L105                      | Drug-induced pemphigus                               | 0                           | 0                                |
| L640                      | Drug-induced androgenic alopecia                     | 0                           | 2                                |
| M1020-M1029               | Drug-induced gout                                    | 1                           | 3                                |
| M320                      | Drug-induced systemic lupus erythematosus            | 1                           | 10                               |
| M8040-M8049               | Drug-induced osteoporosis with pathological fracture | 5                           | 5                                |
| M8140-M8149               | Drug-induced osteoporosis                            | 15                          | 199                              |
| M8350-M8359               | Other drug-induced osteomalacia in adults            | 0                           | 0                                |
| R502                      | Drug-induced fever                                   | 16                          | 8                                |

<sup>a</sup> Both the coding and the meaning were derived from Data-coding 19 of UKB.

<sup>b</sup> Number of individuals were counted using ICD10 main diagnoses data (Data field: 41202) of UKB.

<sup>c</sup> Number of individuals were counted using ICD10 secondary diagnoses data (Data field: 41204) of UKB.

## Supplementary References

- 1 Bulik-Sullivan, B. K. *et al.* LD Score regression distinguishes confounding from polygenicity in genome-wide association studies. *Nature genetics* **47**, 291-295, (2015).
