# Supplementary material for: Genome-wide association study of medication-use and associated disease in the UK Biobank
Source: PubMed Central journal article supplement (PMC6478889; doi:10.1038/s41467-019-09572-5), 2019-04-23
Supplement: 41467_2019_9572_MOESM2_ESM.pdf [file 41467_2019_9572_MOESM2_ESM.pdf]

#### Description of Additional Supplementary Files

- Supplementary Data 1. Active ingredients and ATC code of medications in UK Biobank.
- Supplementary Data 2. The independent SNPs ( $P \leq 5E-8$ ) associated with the 23 medication-taking traits.
- Supplementary Data 3. Results of partitioning the 23 traits' SNP-heritability to 205 tissues/cell types using cell type specific analyses.
- Supplementary Data 4. Results of SMR analysis for the 19 medication-taking traits.
- Supplementary Data 5. Results of gene-based association analyses.
- Supplementary Data 6. Results of gene sets enrichment analysis at  $FDR < 5\%$ .
- Supplementary Data 7. Genetic correlation of the 23 medication traits and 21 related diseases/traits.
- Supplementary Data 8. Mendelian Randomization analysis results using the GSMR method and SNPs associated with 15 diseases/traits as instrument (trait1) to investigate the hypothesis of causality of the 23 medication-taking traits (trait 2).

1.
